# Supplementary material
Source: PubMed Central journal article supplement (PMC6322387)
Supplement: EMBR-20-e47181-s002.pdf [file EMBR-20-e47181-s002.pdf]

## Expanded View Figures

### Figure EV1. CLRC interacts with shelterin without affecting ubiquitylation.

- A Mass spectrometry analysis of proteins co-purified with Raf1 fused to the ubiquitin-associated (UBA) domain of the ubiquitin receptor Dsk2 from *S. cerevisiae* (UBA<sup>FLAG</sup>Raf1). This method is based on the *Ubiquitin Ligase Trapping* method originally developed in *S. cerevisiae* [57], which stabilizes the binding of substrates to the ubiquitin ligase. The volcano plot depicts proteins enriched in UBA<sup>FLAG</sup>Raf1 WT cells relative to UBA<sup>FLAG</sup>Raf1 *rik1Δ*. Members of the CLRC and shelterin complexes are highlighted in red and blue, respectively. Bottom panel displays nuclear proteins enriched ( $\log_2 \geq 5$  or  $P \leq 0.01$ ).
- B Silencing reporter assay at *imr1L::ura4<sup>+</sup>*. Fivefold serial dilution on non-selective (EMM) and selective media (EMM + 5-FOA) of WT, *rikΔ*, and UBA<sup>FLAG</sup>Raf1 cells. The N-terminal fusion does not interfere with the function of CLRC in heterochromatin formation. The *rik1Δ* strain was used as negative control.
- C RT-qPCR analysis in strains expressing untagged Raf1, UBA<sup>FLAG</sup>Raf1, and UBA<sup>FLAG</sup>Raf1 *rik1Δ* ( $n = 3$  independent experiments). Data are normalized to input and represented as mean  $\pm$  SEM.
- D Co-immunoprecipitation of Raf1 with Ccq1 (top and middle panel) and Tpz1 (bottom panel) in presence and absence of Rik1. Strains expressing endogenous levels of UBA<sup>FLAG</sup>Raf1 and Ccq1<sup>HA</sup> or Tpz1<sup>HA</sup> were subjected to anti-HA immunoprecipitation in the presence of Benzonase (indicating that the interactions are independent of DNA or RNA; negative control: no antibody, noAb). Input and immunoprecipitated material were analyzed by anti-FLAG immunoblots. For Ccq1<sup>HA</sup>, the reciprocal experiment is also shown.
- E Ubiquitin pull-down experiments. Top panels shows *in vivo* ubiquitylation of Ccq1<sup>HA</sup> in WT and *rik1Δ* cells expressing 6His-ubiquitin. Left panels: precipitated 6His-ubiquitin conjugates (20%) analyzed by anti-His and anti-HA immunoblots. Right panel: input fraction (0.1%) analyzed by anti-HA immunoblot. The bottom panels show 6His-ubiquitin pull-down assays for Rap1<sup>HA</sup> in WT and *rik1Δ* cells (left) and Epe1<sup>FLAG</sup> in WT cells (right). Epe1 is shown as an example for poly-ubiquitylation. WT cells expressing untagged ubiquitin are used as negative control.
- F Anti-HA immunoblot of epitope-tagged shelterin proteins expressed from their endogenous locus in WT and *rik1Δ* cells. The asterisks denote unspecific signals derived from cross-reactions with the anti-HA antibody. Note that Ccq1 is expressed at higher levels compared to other shelterin subunits; endogenous levels of Pot1 are low and not detected by the immunoblot. Estimated sizes (kDa) of the tagged proteins: Ccq1 (86 kDa), Tpz1 (61 kDa), Pot1 (67 kDa), Poz1 (34 kDa), and Rap1 (84 kDa).

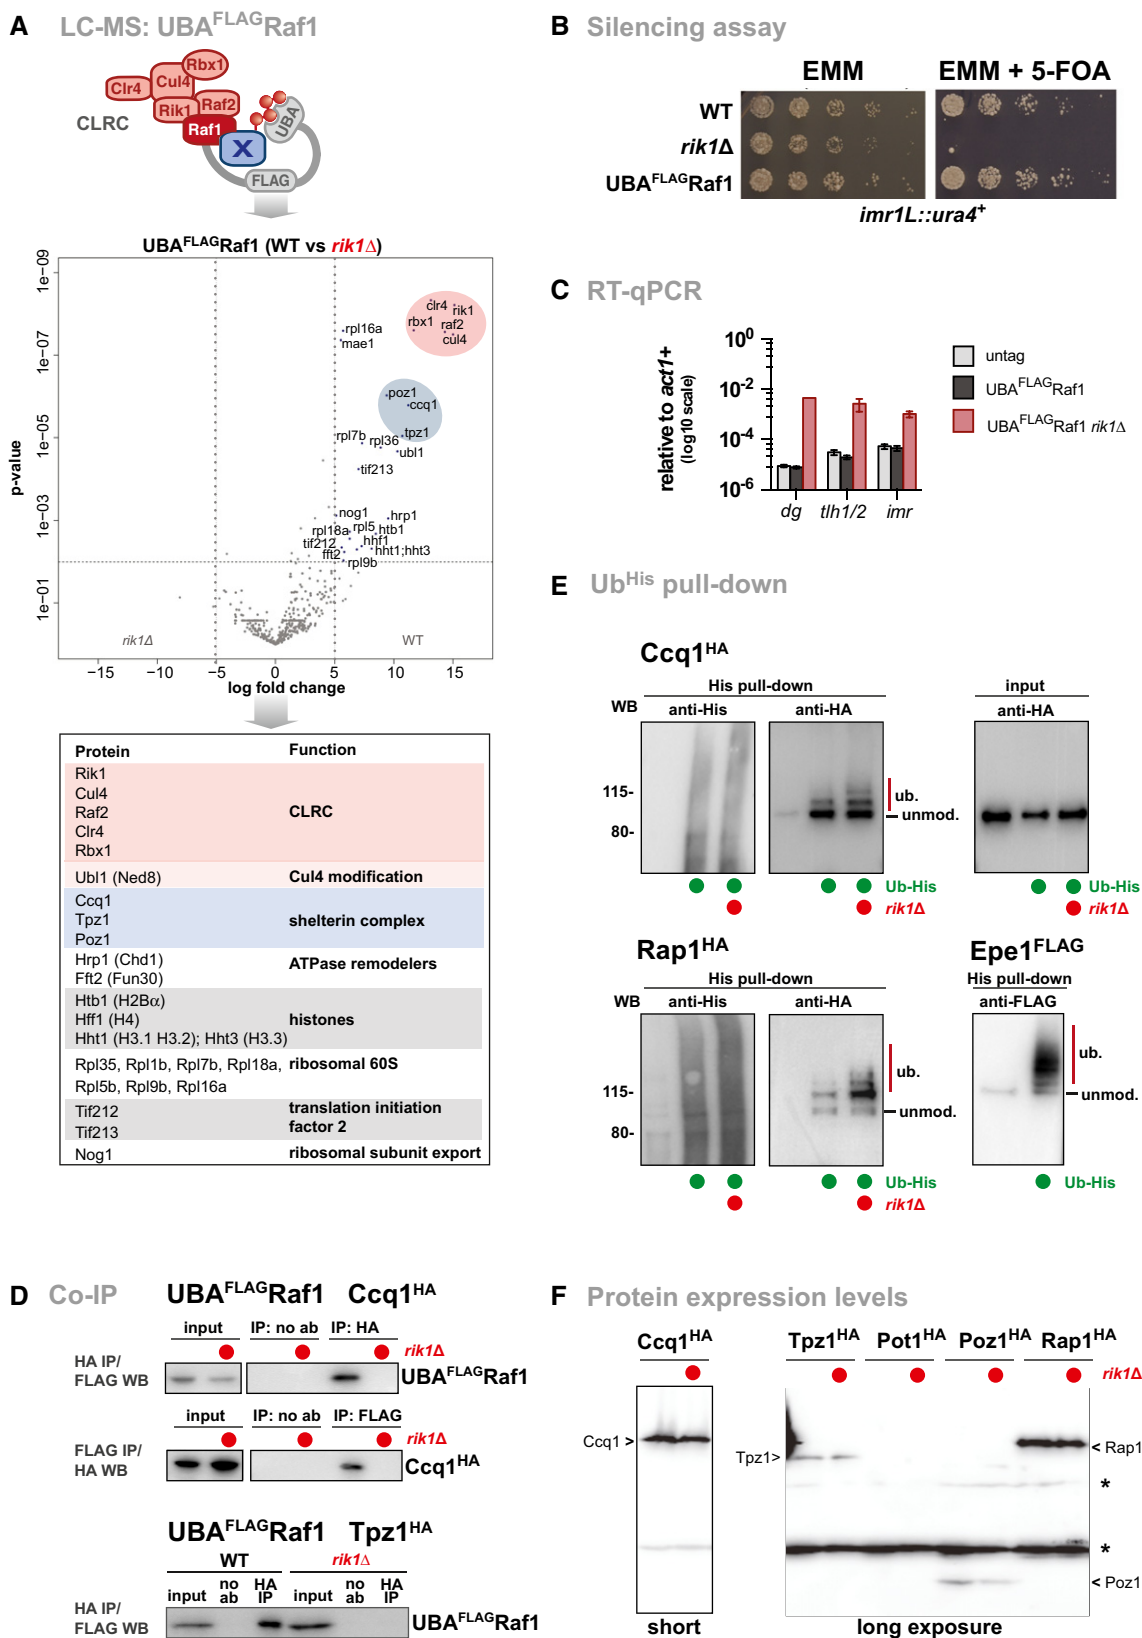

Figure EV1.

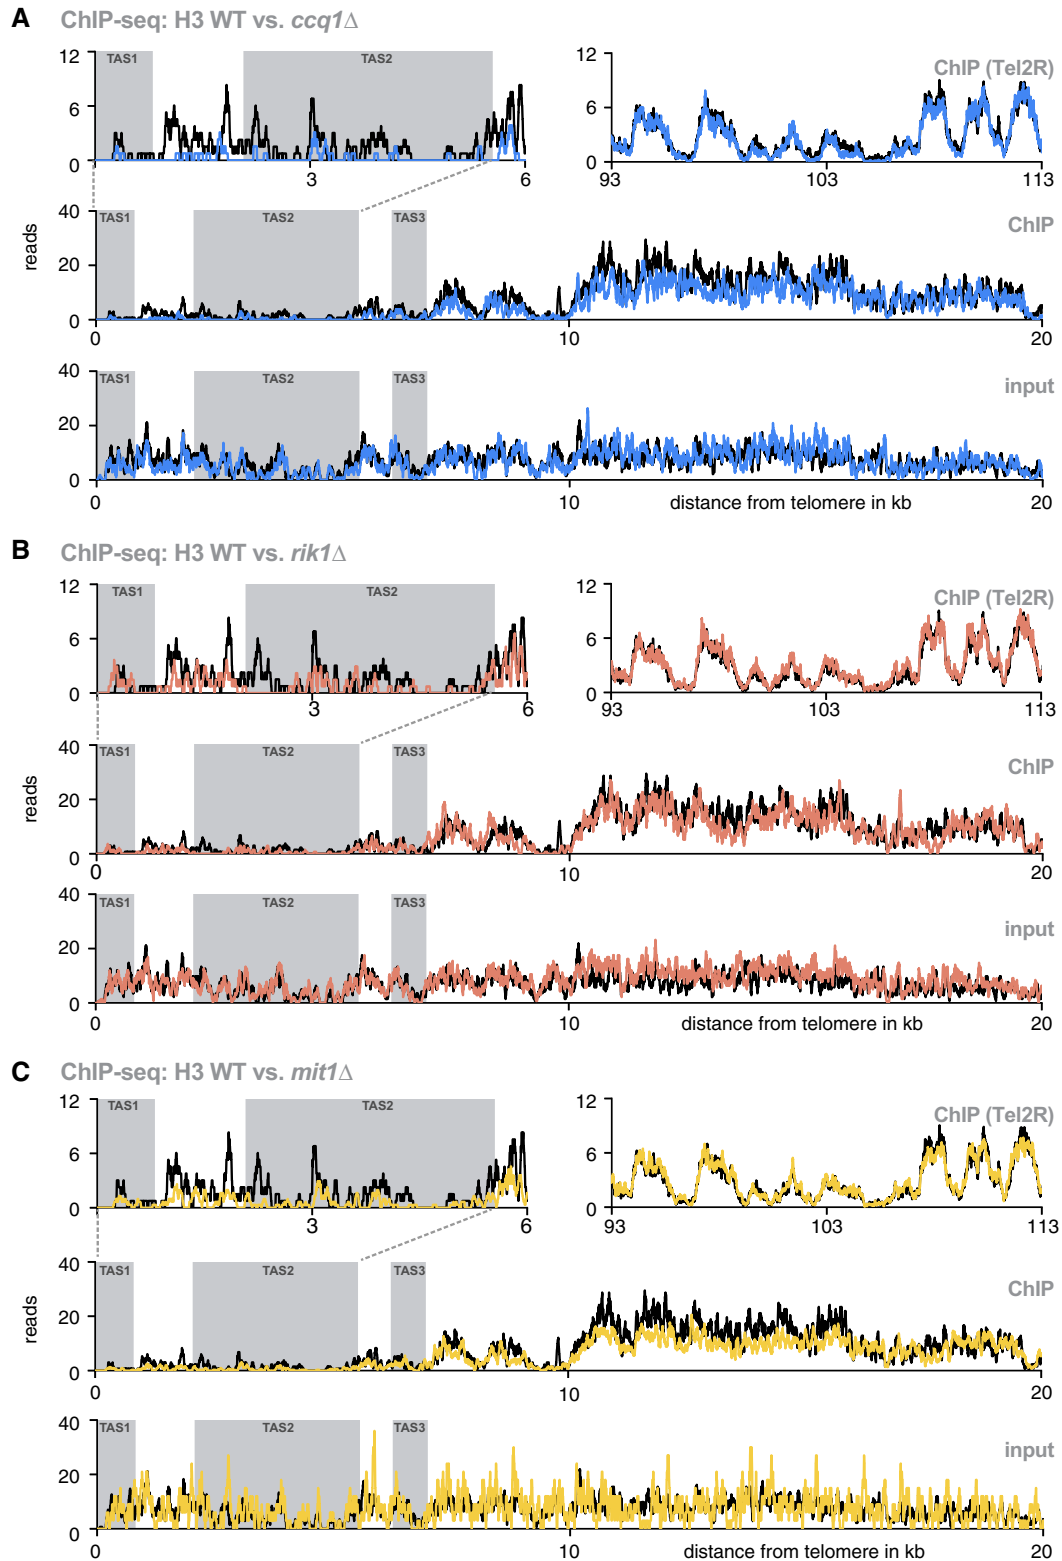

**Figure EV2.** Subtelomeric H3 profiles in WT cells and mutants deficient in *Ccq1*, *CLRC*, and *SHREC*.

A–C ChIP-seq reads mapped to TEL2R (shown in reverse orientation for consistency) for WT (black) vs. *ccq1* $\Delta$  (blue) (A), *rik1* $\Delta$  (red) (B), and *mit1* $\Delta$  (yellow) cells (C). Shown are reads of ChIP data for TAS1 and TAS2 (top left panel), a nucleosome-free region reported by Tashiro *et al* [12] (top right panel), and the subtelomeres including the TAS1-3 and *tlh1*<sup>+</sup> (middle panel). The bottom panel shows input samples for the same region. Gray shaded areas are TAS regions.

**A ChIP: H3**

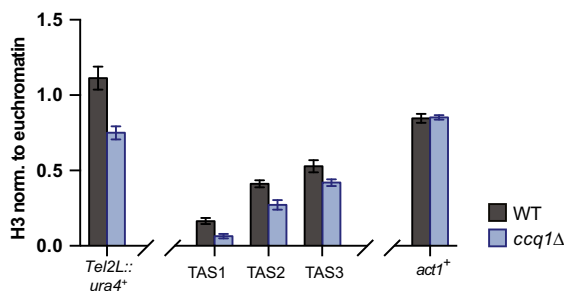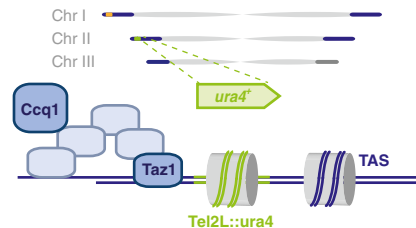

**B ChIP: H3**

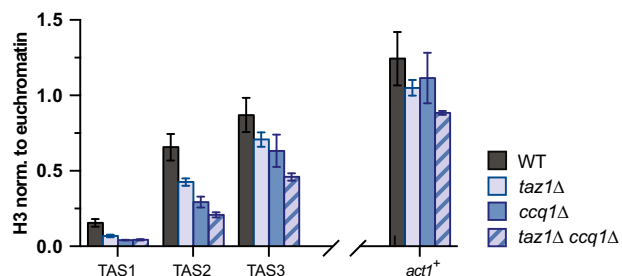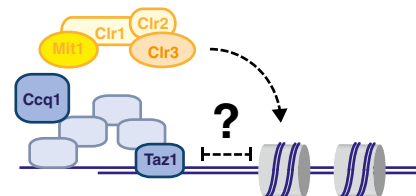

**ChIP: H3**

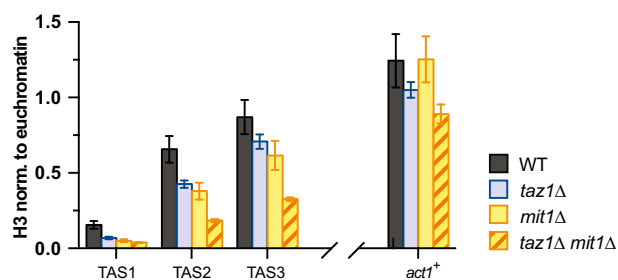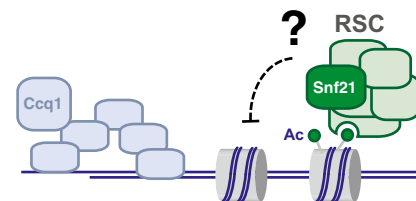

**C ChIP: H3**

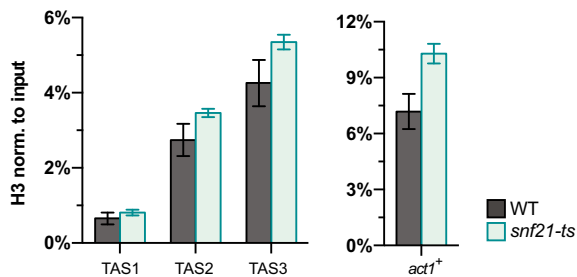

**Figure EV3. Low nucleosome occupancy at TAS is not caused by proximity of telomeric repeats or shelterin binding, RSC.**

A ChIP-qPCR analysis of H3 at reporter gene (*ura4*<sup>+</sup>) and TAS regions WT and *ccq1Δ* strains (see scheme) (*n* = 3 independent experiments).  
 B ChIP-qPCR analysis of H3 in WT, *ccq1Δ*, and *taz1Δ* (top) or *mit1Δ* (bottom) and corresponding double mutants (see scheme) (*n* = 3 independent experiments).  
 C ChIP-qPCR analysis of H3 in WT and *snf21-ts* cells (see scheme) (*n* = 3 independent experiments each derived from 2 to 3 parallel ChIP samples).

Data information: In (A, B), data are represented as mean ± SEM (normalization as in Fig 2B and C). In (C), data are normalized to input and represented as mean ± SEM, note that the global role of RSC precludes using internal controls (i.e., EC) for normalization.

## A telomeric transcriptome

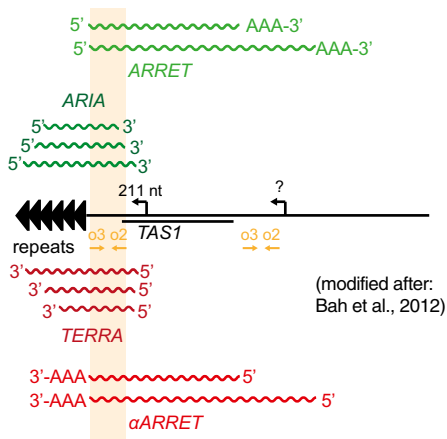

## B ChIP: RNAPII-S5P

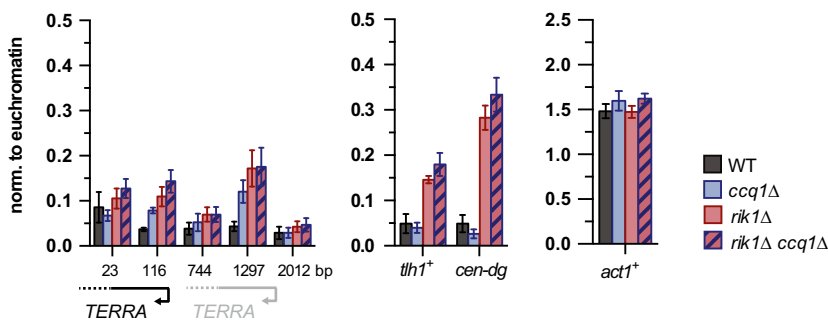

## C RT-qPCR

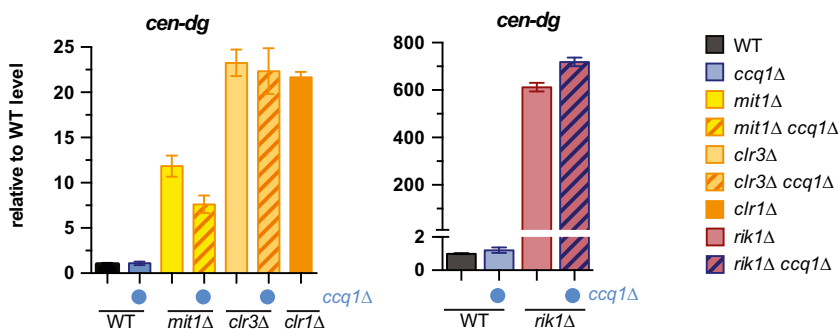

## Figure EV4. Expression of telomeric transcripts in the absence of CLRC and SHREC.

- A Scheme of telomeric transcripts (modified after [36]). Whereas *ARRET* and  $\alpha$ *ARRET* RNAs have a poly-A tail, only a small percentage of *TERRA* and *ARIA* transcripts are poly-adenylated. The amplicon (primers o2 + o3) used for RT-qPCR and ChIP-qPCR analysis anneals to all telomeric transcripts without discriminating strand specificity or shorter species that lack transcribed parts from the telomeric repeats. For simplicity, we refer to these transcripts as "TERRA". An identical sequence of the o2/o3 amplicon is present in a telomere-distal region, but it is unknown whether this region also contains transcription start sites.
- B ChIP-qPCR analysis of RNAPII-S5P in WT, *ccq1Δ*, *rik1Δ*, and the corresponding double mutant ( $n = 3$  independent experiments).
- C *Ccq1* is not involved in silencing of pericentromeric heterochromatin. RT-qPCR analysis of transcript levels of *cen-dg* in WT, *ccq1Δ*, *mit1Δ*, *clr3Δ*, *rik1Δ*, double mutants with *ccq1Δ* (indicated by blue dot), and *clr1Δ* cells ( $n = 3$  independent experiments)

Data information: In (B), data are shown relative to the average of three euchromatic genes (EC) and represented as mean  $\pm$  SEM. In (C), data are represented as mean  $\pm$  SEM and shown relative to WT level.

*tel1L::his3<sup>+</sup> tel2L::ura4<sup>+</sup>*

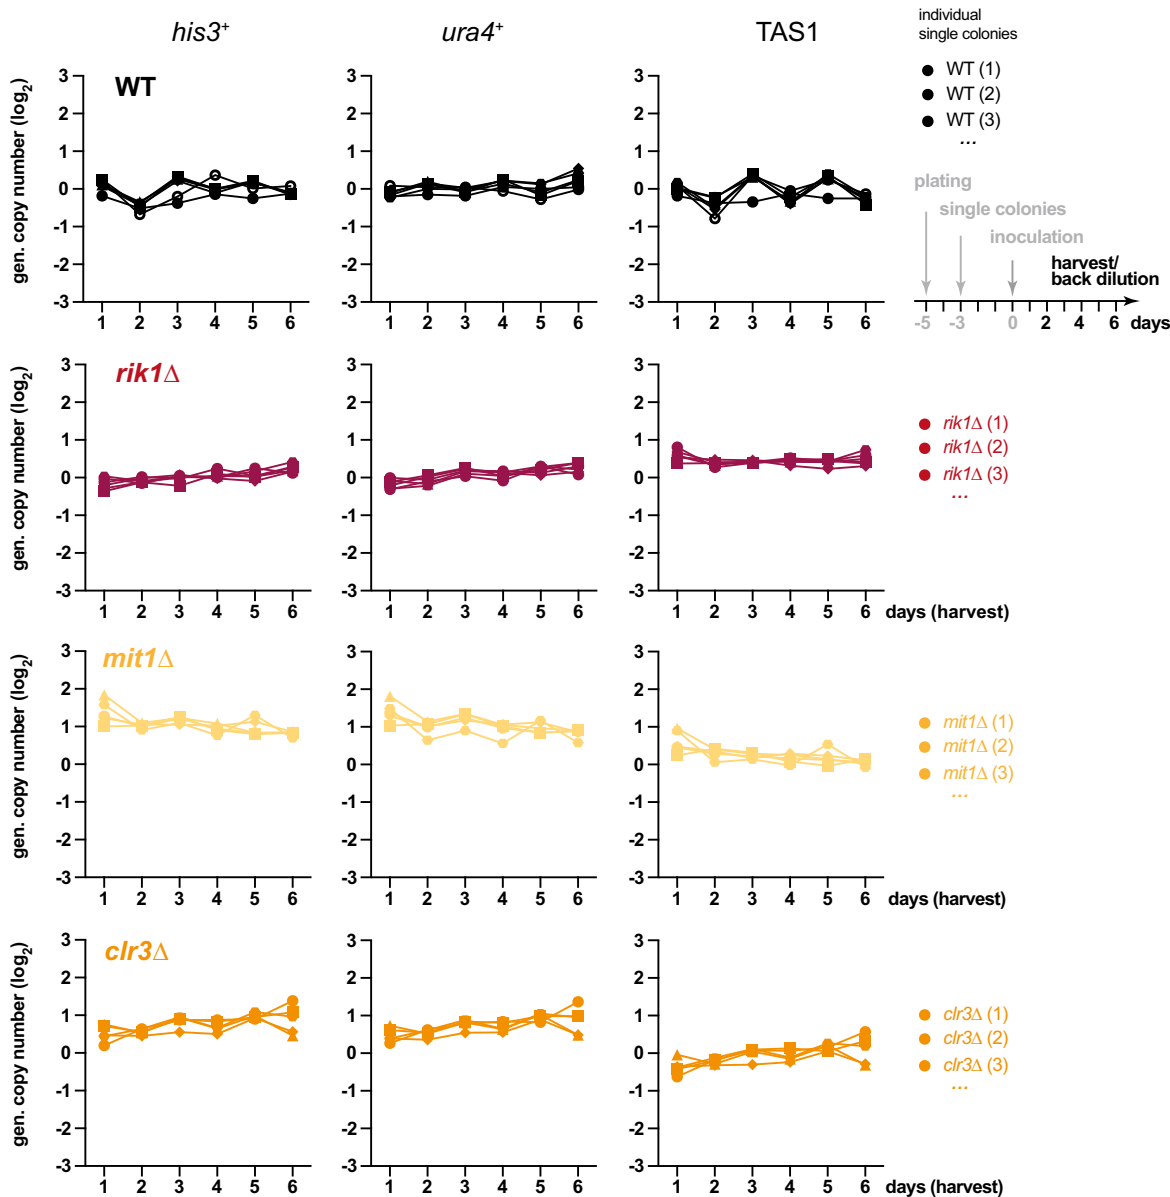

**Figure EV5. Subtelomeres do not undergo recombination in the absence of CLRC and SHREC.**

Genomic copy number of *his3<sup>+</sup>*, *ura4<sup>+</sup>*, and **TAS1** in indicated strains harboring the reporter genes *tel1L::his3<sup>+</sup>* and *tel2L::ura4<sup>+</sup>* cells. Cultures from individual WT and knockout clones (WT, *n* = 6; *rik1Δ*, *n* = 6; *mit1Δ*, *n* = 5; *clr3Δ*, *n* = 5) were inoculated at day 0 to grow in liquid media with regular back-dilution (every 24 h, approximately 7 generations). Samples were taken at indicated harvest times, and relative copy numbers of genomic regions were assessed by qPCR (normalization against intrachromosomal loci).
